# Supplementary material
Source: PubMed Central journal article supplement (PMC9255694)
Supplement: glab271_suppl_supplementary_appendix_a.pdf [file glab271_suppl_supplementary_appendix_a.pdf]

## Appendix A. Mean Change in Outcome Measures with Non-significant Differences in Slopes by Sex

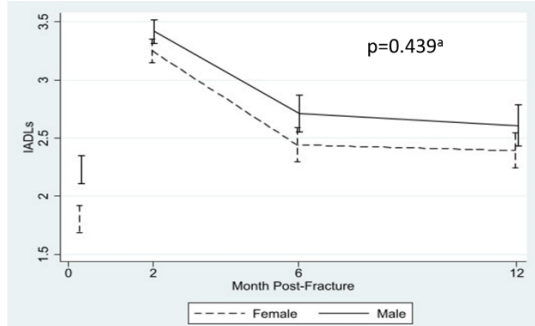

|          | Baseline | 2 Month | 6 Month | 12 Month |
|----------|----------|---------|---------|----------|
| Female n | 165      | 132     | 104     | 102      |
| Male n   | 161      | 130     | 93      | 84       |

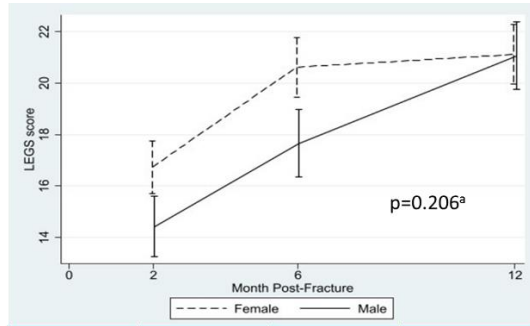

|          | 2 Month | 6 Month | 12 Month |
|----------|---------|---------|----------|
| Female n | 91      | 78      | 76       |
| Male n   | 84      | 70      | 61       |

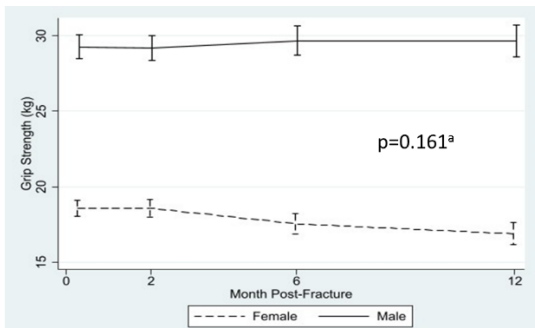

|          | Baseline | 2 Month | 6 Month | 12 Month |
|----------|----------|---------|---------|----------|
| Female n | 162      | 110     | 91      | 86       |
| Male n   | 160      | 110     | 91      | 74       |

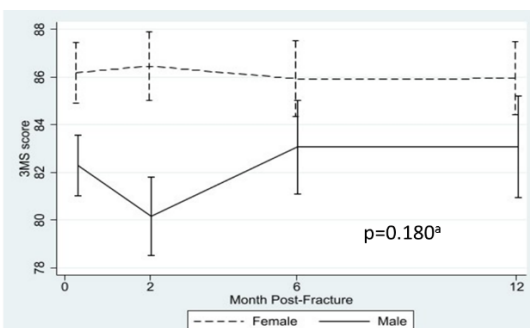

|          | Baseline | 2 Month | 6 Month | 12 Month |
|----------|----------|---------|---------|----------|
| Female n | 167      | 128     | 104     | 103      |
| Male n   | 164      | 125     | 94      | 82       |

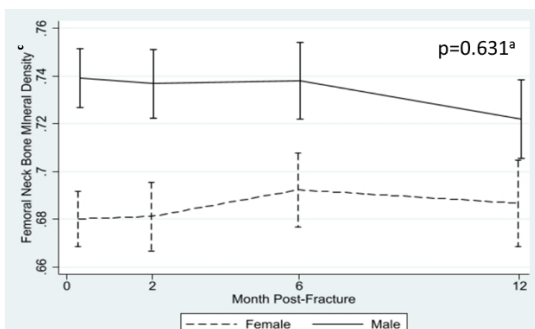

|          | Baseline | 2 Month | 6 Month | 12 Month |
|----------|----------|---------|---------|----------|
| Female n | 130      | 90      | 83      | 76       |
| Male n   | 123      | 94      | 75      | 67       |

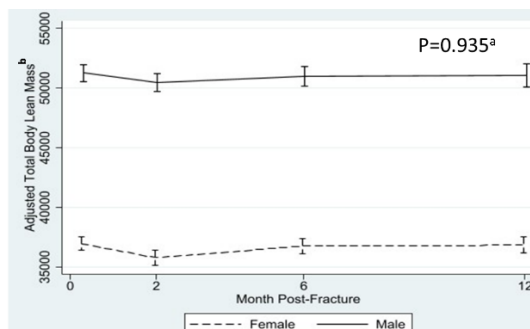

|          | Baseline | 2 Month | 6 Month | 12 Month |
|----------|----------|---------|---------|----------|
| Female n | 129      | 90      | 82      | 76       |
| Male n   | 121      | 93      | 75      | 66       |

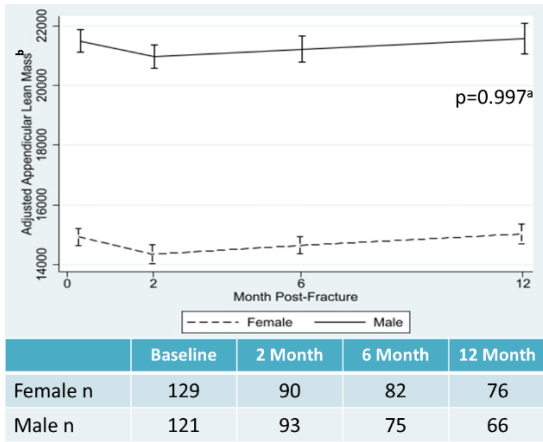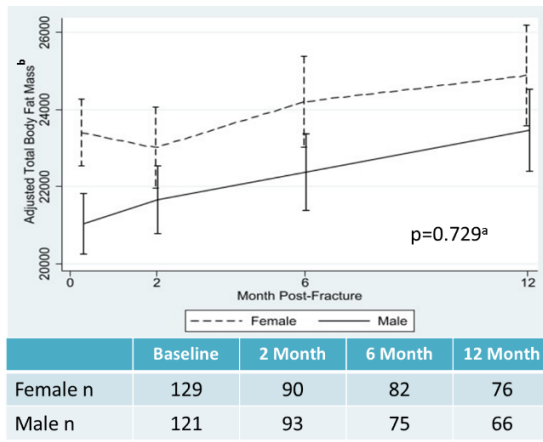

Abbreviations: Instrumental Activities of Daily Living; LEGS, Lower Extremity Gain Scale; 3MS, Modified Mini-Mental State Examination; BMD, Bone Mineral Density

The reporting period for the baseline assessment of IADLs was during the 2 weeks prior to the fracture.

<sup>a</sup>P-value for hypothesis test of difference in slopes

<sup>b</sup>Adjusted for affected leg and machine type

<sup>c</sup>Adjusted for machine type
